# Supplementary material
Source: PubMed Central journal article supplement (PMC4653826)
Supplement: Supp_Fig2.pdf [file Supp_Fig2.pdf]

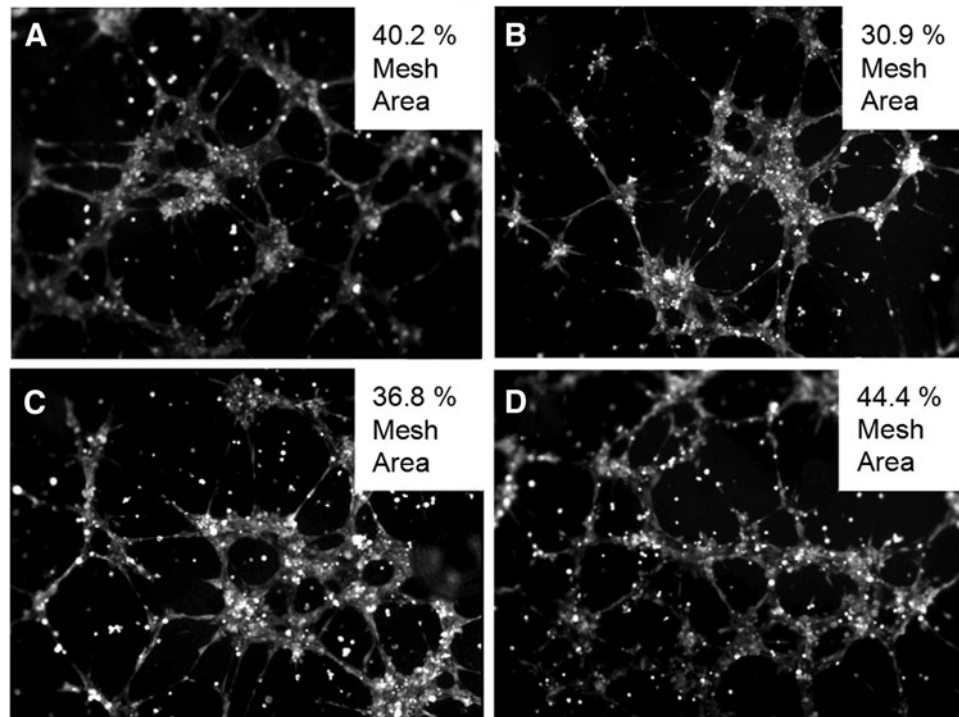

**SUPPLEMENTARY FIG. S2.** Tube formation by iPSC-EC at passage 6. No virus (A), empty vector LV transduction (B), SIRT1H363Y LV transduction (C), and SIRT1 LV transduction (D). Fluorescent microscopic imaging was taken 4 h after cell seeding with Calcein AM staining.
